# Supplementary material
Source: Springer Nature journal article supplement (https://www.springermedizin.de/resource/supplementary/12943_2010_807_MOESM9_ESM.pdf/9554882)

**A****O<sub>2</sub> consumption**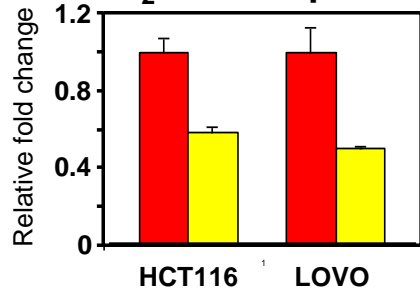**B****ATP**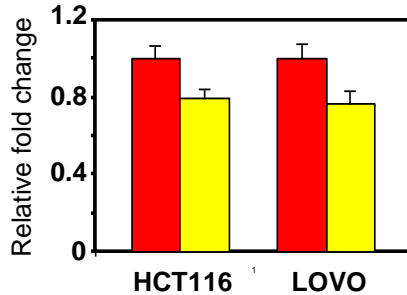**C****CM-H<sub>2</sub>DCFDA****MitoSOX**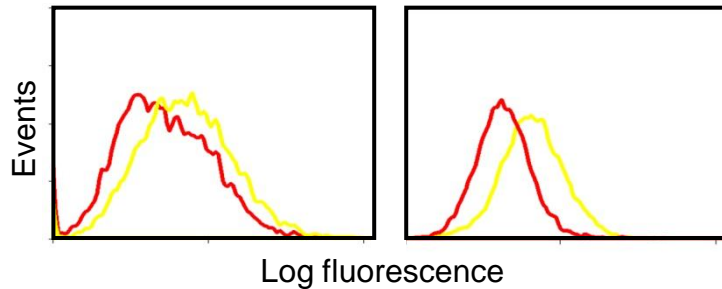

Supplement: MOESM9 [file 9554882]
